# Supplementary material
Source: Research Square preprint supplement (doi:10.21203/rs.3.rs-8927799/v1)
Supplement: Supplementary file 1 [file 34204e00a87d1da6defa9f6e.docx]

**Supplementary Materials:**

**Intersectional Influences on Non-Engagement Among Critical Care Survivors: A Prospective Cohort Study.**

Saira Nazeer 1,2 *, Alexander J Fowler 2,3, Amar Ahmad 4, Tim Stephens 1,2, Yize I Wan1,2, Julie Sanders5,6, John Prowle 1,2, Rupert Pearse 1,2 and Zudin Puthucheary 1,2

**1) Supplementary Table 1: A table to show the data we excluded due to missing data (not including those that did not survive to discharge from critical care/hospital) stratified by engagement status.**

Numbers are presented as n (% of total) unless otherwise stated. To calculate p values, Mann-Whitney U was used for continuous data and chi-squared tests for categorical data. Data regarding residence prior to admission has been omitted for data integrity concerns. IMD quintiles based on IMD rank within the cohort.

|  | **Missing datasets (n=129)** | **Engagement status** | |
| --- | --- | --- | --- |
|  |  | **Non-Engaged (n= 96)** | **Engaged (n= 33)** |
|  |  |  |  |
| **AGE** |  |  |  |
| Total missing (0) | 0 | 0 | 0 |
| **ETHNICITY** |  |  |  |
| Total missing (0) | 0 | 0 | 0 |
| **SEX** |  |  |  |
| Total missing (0) | 0 | 0 | 0 |
| **IMD QUINTILE** |  |  |  |
| Total missing (42) | 42 | 39 | 3 |
| **FRAILTY** |  |  |  |
| Total missing (6) | 6 | 6 | 0 |
| **MAX ORGAN SUPPORT** |  |  |  |
| Total missing (0) | 0 | 0 | 0 |
| **ADMITTING SPECIALITY** 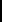 | |  |  |
| Total missing (0) | 0 | 0 | 0 |
| **SOFA** |  |  |  |
| Total missing (60) | 60 | 37 | 23 |
| **APACHE** |  |  |  |
| Total missing (21) | 21 | 14 | 7 |
| **CRITICAL CARE LOS** |  |  |  |
| Total missing (0) | 0 | 0 | 0 |
|  |  |  |  |
| **TOTAL missing** | **129** | **96** | **33** |

**2) Strobe Checklist**

|  | Item No | Recommendation |  | Page |  |
| --- | --- | --- | --- | --- | --- |
| **Title and abstract** | 1 | (*a*) Indicate the study’s design with a commonly used term in the title or the abstract |  | 1 |  |
| (*b*) Provide in the abstract an informative and balanced summary of what was done and what was found |  | 2 |  |
| Introduction | | |  |  |  |
| Background/rationale | 2 | Explain the scientific background and rationale for the investigation being reported |  | 3 |  |
| Objectives | 3 | State specific objectives, including any prespecified hypotheses |  | 3 |  |
| Methods | | |  |  |  |
| Study design | 4 | Present key elements of study design early in the paper |  | 3/4 |  |
| Setting | 5 | Describe the setting, locations, and relevant dates, including periods of recruitment, exposure, follow-up, and data collection |  | 4 |  |
| Participants | 6 | (*a*) *Cohort study*—Give the eligibility criteria, and the sources and methods of selection of participants. Describe methods of follow-up  *Case-control study*—Give the eligibility criteria, and the sources and methods of case ascertainment and control selection. Give the rationale for the choice of cases and controls  *Cross-sectional study*—Give the eligibility criteria, and the sources and methods of selection of participants |  | 4 |  |
| (*b*)*Cohort study*—For matched studies, give matching criteria and number of exposed and unexposed  *Case-control study*—For matched studies, give matching criteria and the number of controls per case |  |  |  |
| Variables | 7 | Clearly define all outcomes, exposures, predictors, potential confounders, and effect modifiers. Give diagnostic criteria, if applicable |  | 4/5 |  |
| Data sources/ measurement | 8* | For each variable of interest, give sources of data and details of methods of assessment (measurement). Describe comparability of assessment methods if there is more than one group |  | 5 |  |
| Bias | 9 | Describe any efforts to address potential sources of bias |  | 5 |  |
| Study size | 10 | Explain how the study size was arrived at |  | 5 |  |
| Quantitative variables | 11 | Explain how quantitative variables were handled in the analyses. If applicable, describe which groupings were chosen and why |  | 5 |  |
| Statistical methods | 12 | (*a*) Describe all statistical methods, including those used to control for confounding |  | 5 |  |
| (*b*) Describe any methods used to examine subgroups and interactions |  | 5 |  |
| (*c*) Explain how missing data were addressed |  | 5/6 and Supplementary Table 1 |  |
| (*d*) *Cohort study*—If applicable, explain how loss to follow-up was addressed  *Case-control study*—If applicable, explain how matching of cases and controls was addressed  *Cross-sectional study*—If applicable, describe analytical methods taking account of sampling strategy |  |  |  |
| (*e*) Describe any sensitivity analyses |  |  |  |

| Results | | | Page |
| --- | --- | --- | --- |
| Participants | 13* | (a) Report numbers of individuals at each stage of study—eg numbers potentially eligible, examined for eligibility, confirmed eligible, included in the study, completing follow-up, and analysed | 6 and Figure 1 |
| (b) Give reasons for non-participation at each stage |  |
| (c) Consider use of a flow diagram | Figure 1 |
| Descriptive data | 14* | (a) Give characteristics of study participants (eg demographic, clinical, social) and information on exposures and potential confounders | 6 and Table 1 |
| (b) Indicate number of participants with missing data for each variable of interest | 5 and Figure 1 and supplementary table 1 |
| (c) *Cohort study*—Summarise follow-up time (eg, average and total amount) |  |
| Outcome data | 15* | *Cohort study*—Report numbers of outcome events or summary measures over time | *6* |
| *Case-control study—*Report numbers in each exposure category, or summary measures of exposure |  |
| *Cross-sectional study—*Report numbers of outcome events or summary measures |  |
| Main results | 16 | (*a*) Give unadjusted estimates and, if applicable, confounder-adjusted estimates and their precision (eg, 95% confidence interval). Make clear which confounders were adjusted for and why they were included | 6-10 |
| (*b*) Report category boundaries when continuous variables were categorized |  |
| (*c*) If relevant, consider translating estimates of relative risk into absolute risk for a meaningful time period |  |
| Other analyses | 17 | Report other analyses done—eg analyses of subgroups and interactions, and sensitivity analyses | 6-10 |
| Discussion | | |  |
| Key results | 18 | Summarise key results with reference to study objectives | 11 |
| Limitations | 19 | Discuss limitations of the study, taking into account sources of potential bias or imprecision. Discuss both direction and magnitude of any potential bias | 12 |
| Interpretation | 20 | Give a cautious overall interpretation of results considering objectives, limitations, multiplicity of analyses, results from similar studies, and other relevant evidence | 12 |
| Generalisability | 21 | Discuss the generalisability (external validity) of the study results | 12 |
| Other information | | |  |
| Funding | 22 | Give the source of funding and the role of the funders for the present study and, if applicable, for the original study on which the present article is based | 14 |
